# Supplementary material for: A smart two-photon fluorescent platform based on desulfurization–cyclization: a phthalimide–rhodamine chemodosimeter for Hg2+ NIR emission at 746 nm and through-bond energy transfer
Source: Royal Society of Chemistry journal article supplement (doi:10.1039/c7nj02814h), 2017-01-01
Supplement: c7nj02814h1.pdf [file c7nj02814h1.pdf]

## Supporting Information

### **A smart two-photon fluorescent platform based on desulfurization-cyclization: phthalimide-rhodamine chemodosimeter for Hg<sup>2+</sup>, NIR emission at 746 nm and through-bond energy transfer**

Shan-kun Yao<sup>a</sup>, Ying Qian<sup>a,\*</sup>, Zheng-qing Qi<sup>b</sup>, Chang-gui Lv<sup>b</sup>, Yi-ping Cui<sup>b</sup>

*a. School of Chemistry and Chemical Engineering, Southeast University, Nanjing,*

*211189, China, E-mail: [yingqian@seu.edu.cn](mailto:yingqian@seu.edu.cn)*

*b. Advanced Photonics Center, Southeast University, Nanjing, 211189, China, E-mail:*

*[cyp@seu.edu.cn](mailto:cyp@seu.edu.cn)*

*\*Corresponding author: E-mail address: [yingqian@seu.edu.cn](mailto:yingqian@seu.edu.cn)*

**Fig. S1.** <sup>1</sup>H-NMR spectrum of CyRSN.

**Fig. S2.** <sup>13</sup>C-NMR spectrum of CyRSN.

**Fig. S3.** MS spectrum of CyRSN.

**Fig. S4.** <sup>1</sup>H-NMR spectrum of M<sub>2</sub>.

**Fig. S5.** <sup>13</sup>C-NMR spectrum of M<sub>2</sub>.

**Fig. S6.** MS spectrum of M<sub>2</sub>.

**Fig. S7.** <sup>1</sup>H-NMR spectrum of M<sub>3</sub> (CyR).

**Fig. S8.** <sup>13</sup>C-NMR spectrum of M<sub>3</sub> (CyR).

**Fig. S9.** <sup>1</sup>H-NMR spectrum of NG-ML.

**Fig. S10.** The linear relationship between the fluorescence intensity of probe at 746 nm and Hg<sup>2+</sup> in concentration within the range 0-10 μM and 30-50 μM.

**Fig. S11.** (a) Fluorescence ratio response (F<sub>746 nm</sub>/F<sub>540 nm</sub>) of free CyRSN (10 μM) and after addition of Hg<sup>2+</sup> (30 μM) in a PBS buffer-MeOH (v/v = 50/50, 50 mM PBS) solution as a function of different pH values. The excitation wavelength was 390 nm; (b) time-dependence on the fluorescence intensity at 746 nm of CyRSN (10 μM) upon addition of 2.0 equiv. of Hg<sup>2+</sup> at room temperature; in EtOH/PBS buffer solutions (pH 7.4, v/v, 1 : 1). Excitation wavelength was 670 nm.

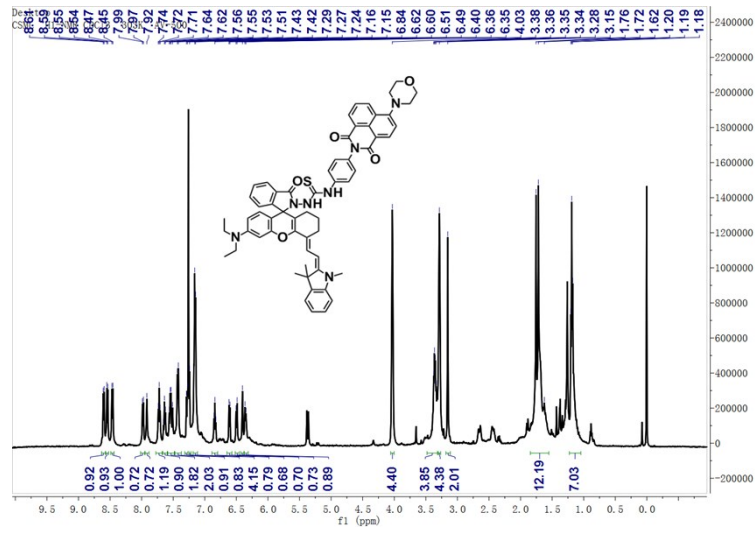

Fig. S1. <sup>1</sup>H-NMR spectrum of CyRSN.

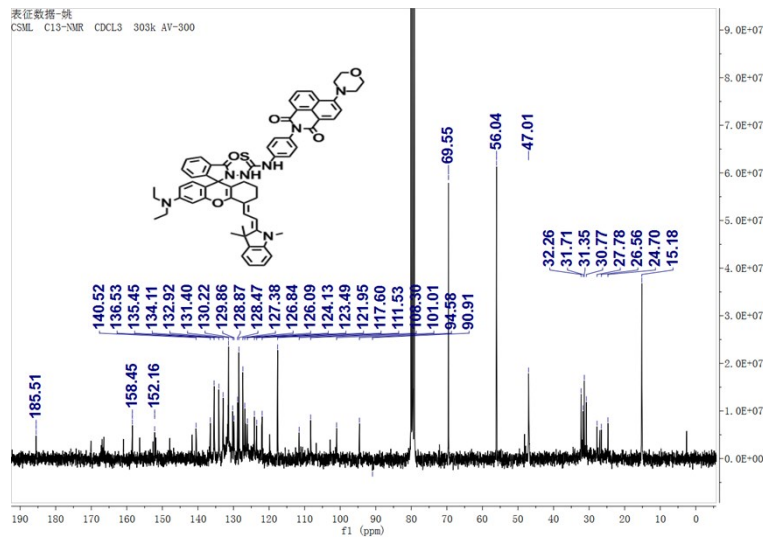

Fig. S2. <sup>13</sup>C-NMR spectrum of CyRSN.

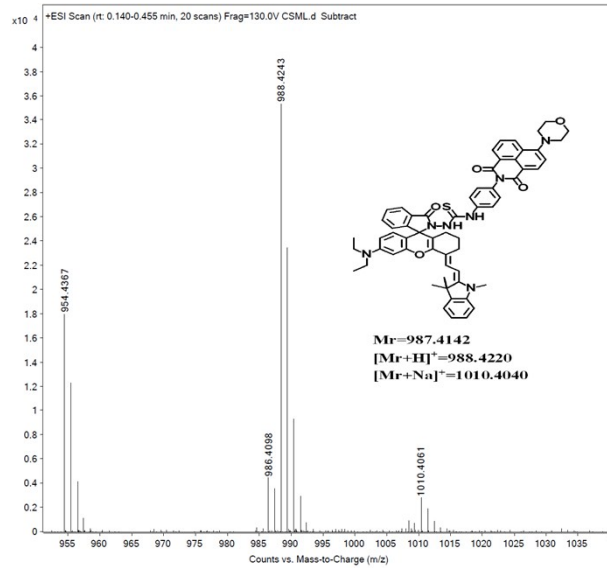

Fig. S3. MS spectrum of CyRSN.

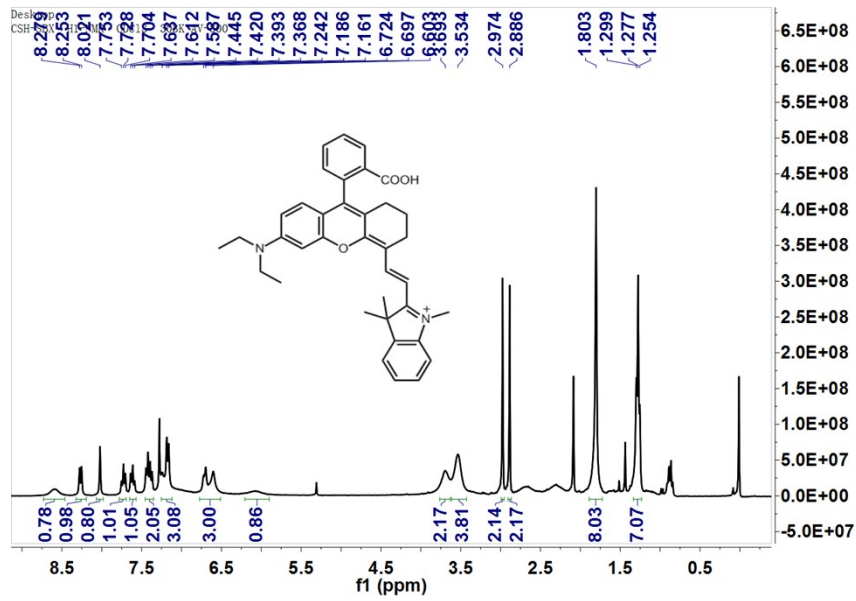

Fig. S4. <sup>1</sup>H-NMR spectrum of M<sub>2</sub>.

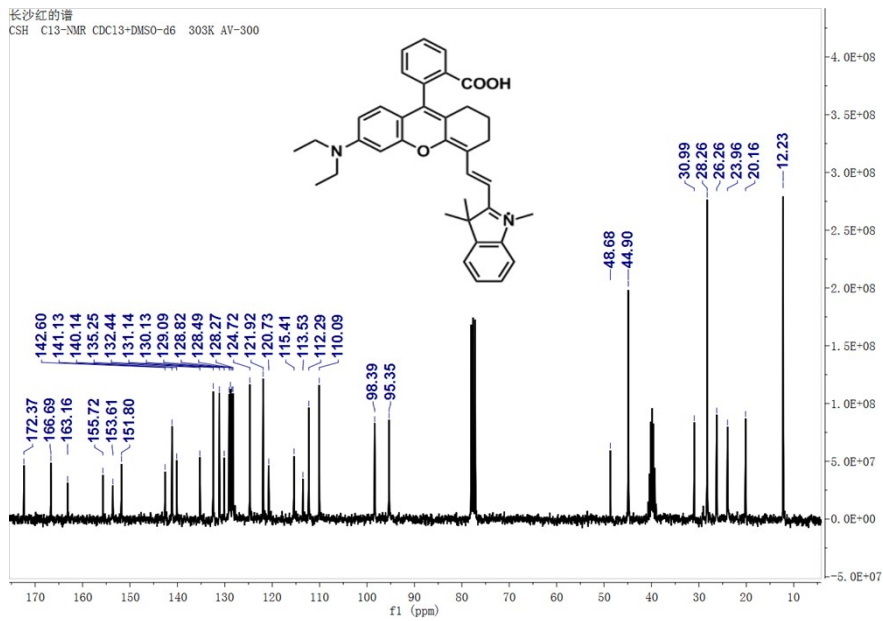

Fig. S5. <sup>13</sup>C-NMR spectrum of M<sub>2</sub>.

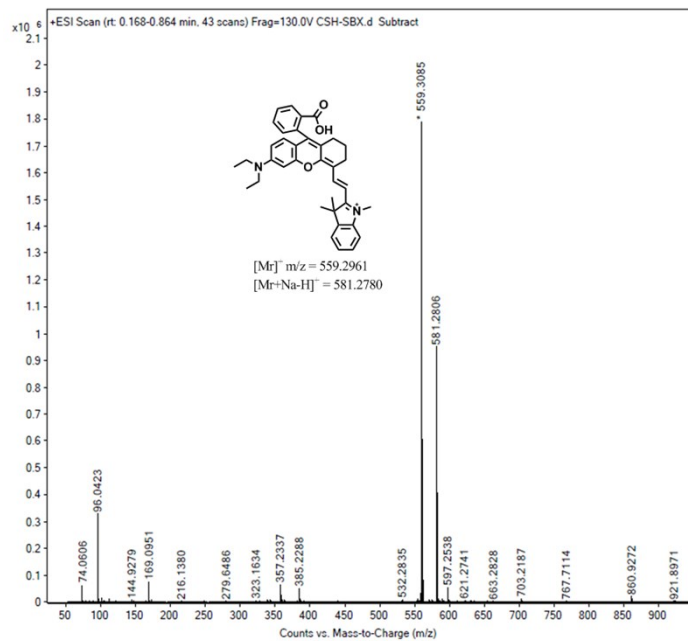

Fig. S6. MS spectrum of  $M_2$ .

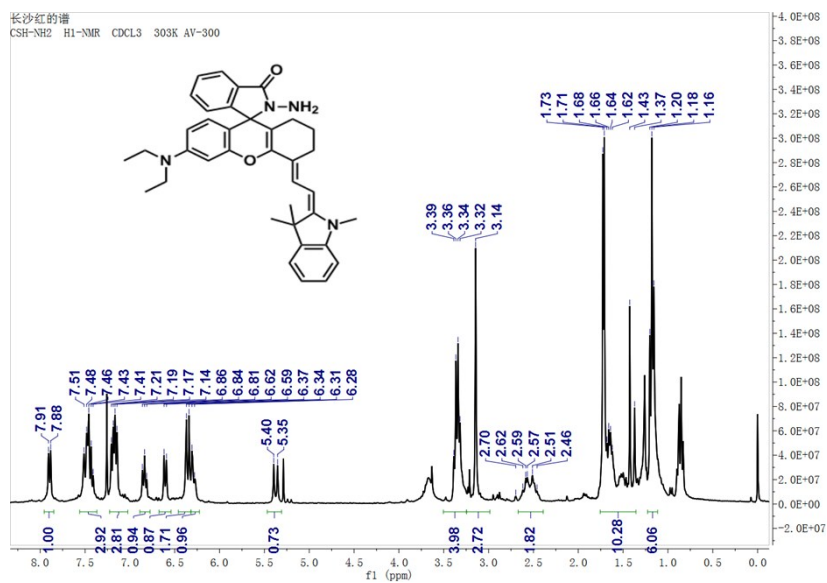

Fig. S7.  $^1\text{H-NMR}$  spectrum of  $M_3$  (CyR).

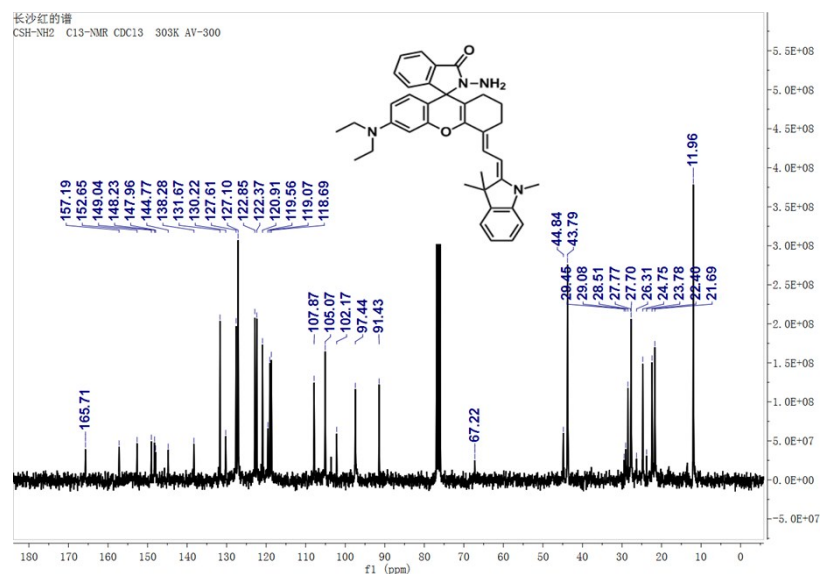

Fig. S8.  $^{13}\text{C}$ -NMR spectrum of M<sub>3</sub> (CyR).

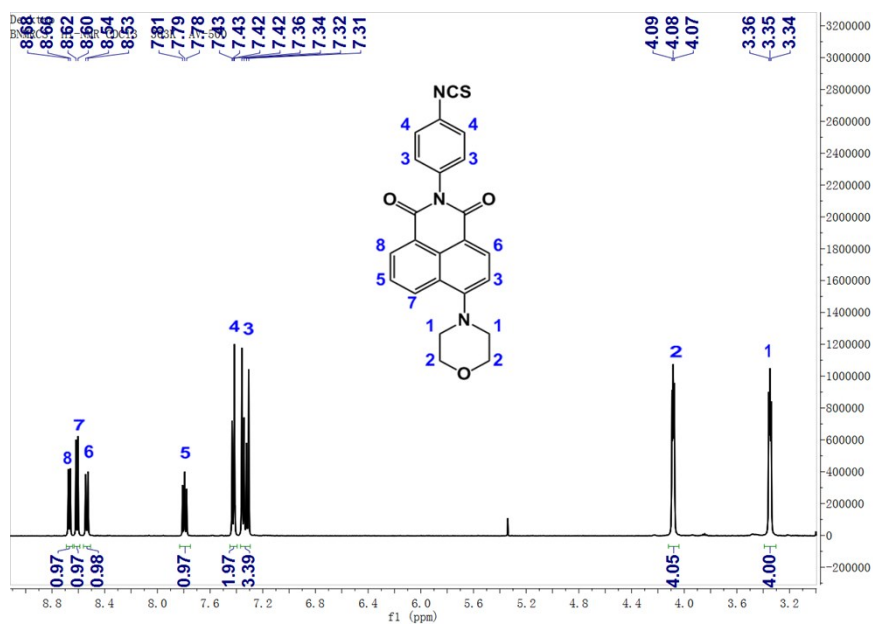

Fig. S9.  $^1\text{H}$ -NMR spectrum of NG-ML.

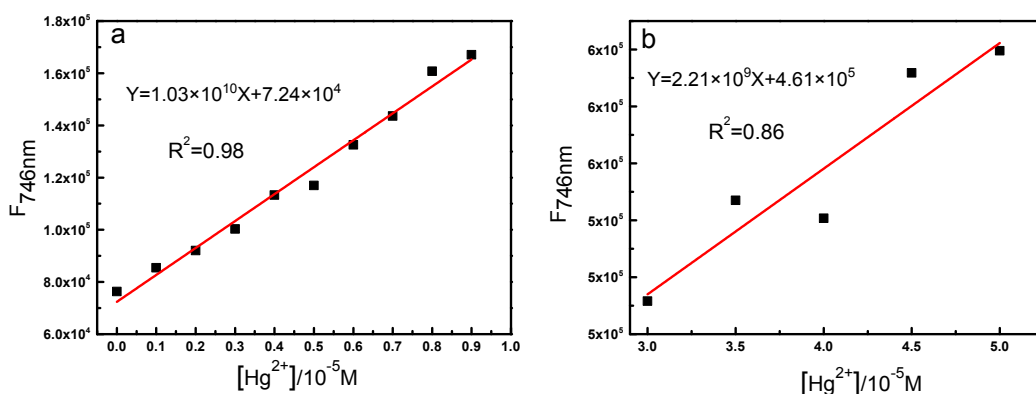

**Fig. S10.** The linear relationship between the fluorescence intensity of probe at 746 nm and  $\text{Hg}^{2+}$  in concentration within the range (a) 0-10  $\mu\text{M}$  and (b) 30-50  $\mu\text{M}$ .

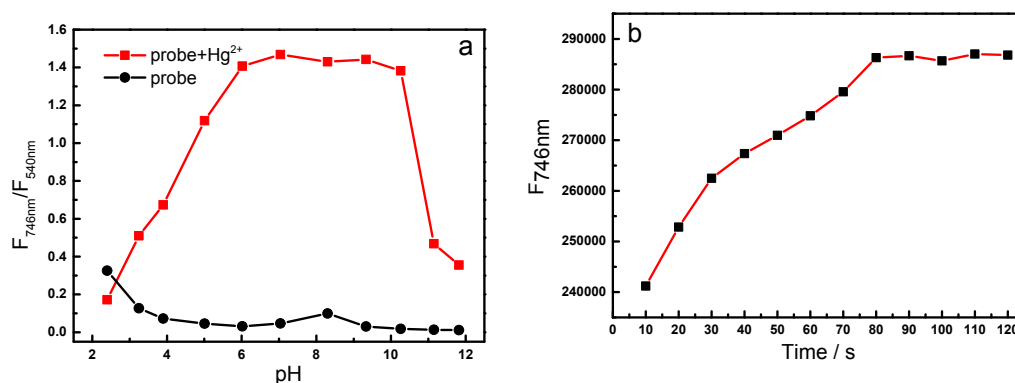

**Fig. S11.** (a) Fluorescence ratio response ( $F_{746\text{ nm}}/F_{540\text{ nm}}$ ) of free CyRSN (10  $\mu\text{M}$ ) and after addition of  $\text{Hg}^{2+}$  (30  $\mu\text{M}$ ) in a PBS buffer-MeOH (v/v = 50/50, 50 mM PBS) solution as a function of different pH values. The excitation wavelength was 390 nm; (b) time-dependence on the fluorescence intensity at 746 nm of CyRSN (10  $\mu\text{M}$ ) upon addition of 2.0 equiv. of  $\text{Hg}^{2+}$  at room temperature; in EtOH/PBS buffer solutions (pH 7.4, v/v, 1 : 1). Excitation wavelength was 670 nm.
